# Supplementary material for: Carotid intima-media thickness stratifies early and supernormal vascular aging phenotypes in UK biobank: Implications for cardiovascular risk prediction
Source: Research Square preprint supplement (doi:10.21203/rs.3.rs-8822772/v1), 2026-02-22
Supplement: Supplementary file 1 [file 9829a381ba932b8f0678c7cd.docx]

**Supplementary Documents**

**Table S1. Hazard Ratios (HRs) for Vascular Aging Phenotypes for Clinical Outcomes in Low-risk Group (10-year FRS risk < 10%).**

| Outcome | VA Categories | Model 1 | | Model 2 | | Model 3 | |
| --- | --- | --- | --- | --- | --- | --- | --- |
| HR (95%CI) | *P* value | HR (95%CI) | *P* value | HR (95%CI) | *P* value |
| MACE | EVA | 2.15 (0.88, 5.27) | 0.093 | 2.15 (0.88, 5.27) | 0.093 | 2.29 (0.93, 5.63) | 0.070 |
| Normal VA | 1.00 (Reference) |  | 1.00 (Reference) |  | 1.00 (Reference) |  |
| SUPERNOVA | 0.99 (0.34, 2.88) | 0.985 | 0.99 (0.34, 2.88) | 0.985 | 0.93 (0.32, 2.71) | 0.893 |
| MI | EVA | 2.89 (0.56, 14.89) | 0.204 | 2.89 (0.56, 14.89) | 0.204 | 3.27 (0.64, 16.83) | 0.156 |
| Normal VA | 1.00 (Reference) |  | 1.00 (Reference) |  | 1.00 (Reference) |  |
| SUPERNOVA | 1.15 (0.20, 6.83) | 0.875 | 1.15 (0.20, 6.83) | 0.875 | 1.02 (0.17, 6.03) | 0.979 |
| Stroke | EVA | 1.67 (0.53, 5.26) | 0.384 | 1.67 (0.53, 5.26) | 0.384 | 1.61 (0.51, 5.10) | 0.419 |
| Normal VA | 1.00 (Reference) |  | 1.00 (Reference) |  | 1.00 (Reference) |  |
| SUPERNOVA | 0.98 (0.25, 3.81) | 0.972 | 0.98 (0.25, 3.81) | 0.972 | 1.06 (0.27, 4.20) | 0.936 |
| CVD Mortality | EVA | 10.70 (0.46, 250.52) | 0.141 | 10.70 (0.46, 250.52) | 0.141 | 10.18 (0.42, 245.10) | 0.153 |
| Normal VA | 1.00 (Reference) |  | 1.00 (Reference) |  | 1.00 (Reference) |  |
| SUPERNOVA | 1.01 (0.07, 15.69) | 0.993 | 1.01 (0.07, 15.69) | 0.993 | 1.26 (0.08, 19.50) | 0.868 |

Model 1: adjusted for age and sex; Model 2: adjusted for age, sex, and Framingham Risk Score; Model 3: Model 2 plus smoking status, drinking status, MET per week, and Townsend Deprivation Index.

VA: vascular aging, HR: hazard ratio, CI: confidence interval, MACE: major adverse cardiovascular events, MI: Myocardial infarction, CVD: Cardiovascular disease, EVA: early vascular aging, SUPERNOVA: Supernormal vascular aging.

**Table S2. Hazard Ratios (HRs) for Vascular Aging Phenotypes for Clinical Outcomes in Low-risk Group (10-year FRS risk ≥ 10% and < 20%).**

| Outcome | VA Categories | Model 1 | | Model 2 | | Model 3 | |
| --- | --- | --- | --- | --- | --- | --- | --- |
| HR (95%CI) | *P* value | HR (95%CI) | *P* value | HR (95%CI) | *P* value |
| MACE | EVA | 1.60 (0.94, 2.71) | 0.084 | 1.60 (0.94, 2.71) | 0.084 | 1.59 (0.93, 2.71) | 0.088 |
| Normal VA | 1.00 (Reference) |  | 1.00 (Reference) |  | 1.00 (Reference) |  |
| SUPERNOVA | 0.77 (0.38, 1.56) | 0.464 | 0.77 (0.38, 1.56) | 0.464 | 0.74 (0.36, 1.51) | 0.405 |
| MI | EVA | 1.47 (0.76, 2.85) | 0.257 | 1.47 (0.76, 2.85) | 0.257 | 1.50 (0.77, 2.92) | 0.234 |
| Normal VA | 1.00 (Reference) |  | 1.00 (Reference) |  | 1.00 (Reference) |  |
| SUPERNOVA | 1.06 (0.38, 2.93) | 0.910 | 1.06 (0.38, 2.93) | 0.910 | 0.98 (0.35, 2.70) | 0.961 |
| Stroke | EVA | 1.73 (0.68, 4.43) | 0.254 | 1.73 (0.68, 4.43) | 0.254 | 1.64 (0.64, 4.19) | 0.302 |
| Normal VA | 1.00 (Reference) |  | 1.00 (Reference) |  | 1.00 (Reference) |  |
| SUPERNOVA | 0.59 (0.23, 1.49) | 0.262 | 0.59 (0.23, 1.49) | 0.262 | 0.66 (0.26, 1.70) | 0.389 |
| CVD Mortality | EVA | 2.78 (0.46, 16.67) | 0.264 | 2.78 (0.46, 16.67) | 0.264 | 2.37 (0.39, 14.21) | 0.346 |
| Normal VA | 1.00 (Reference) |  | 1.00 (Reference) |  | 1.00 (Reference) |  |
| SUPERNOVA | 3.68 (0.48, 28.16) | 0.209 | 3.68 (0.48, 28.16) | 0.209 | 3.77 (0.48, 29.43) | 0.206 |

Model 1: adjusted for age and sex; Model 2: adjusted for age, sex, and Framingham Risk Score; Model 3: Model 2 plus smoking status, drinking status, MET per week, and Townsend Deprivation Index.

VA: vascular aging, HR: hazard ratio, CI: confidence interval, MACE: major adverse cardiovascular events, MI: Myocardial infarction, CVD: Cardiovascular disease, EVA: early vascular aging, SUPERNOVA: Supernormal vascular aging.

**Table S3. Hazard Ratios (HRs) for Vascular Aging Phenotypes for Clinical Outcomes in High-risk Group (10-year FRS risk ≥ 20%).**

| Outcome | VA Categories | Model 1 | | Model 2 | | Model 3 | |
| --- | --- | --- | --- | --- | --- | --- | --- |
| HR (95%CI) | *P* value | HR (95%CI) | *P* value | HR (95%CI) | *P* value |
| MACE | EVA | 2.66 (1.71, 4.15) | p<0.001 | 2.66 (1.71, 4.15) | p<0.001 | 2.69 (1.72, 4.20) | p<0.001 |
| Normal VA | 1.00 (Reference) |  | 1.00 (Reference) |  | 1.00 (Reference) |  |
| SUPERNOVA | 0.65 (0.48, 0.87) | 0.003 | 0.65 (0.48, 0.87) | 0.003 | 0.64 (0.47, 0.85) | 0.003 |
| MI | EVA | 2.61 (1.46, 4.69) | 0.001 | 2.61 (1.46, 4.69) | 0.001 | 2.65 (1.48, 4.77) | 0.001 |
| Normal VA | 1.00 (Reference) |  | 1.00 (Reference) |  | 1.00 (Reference) |  |
| SUPERNOVA | 0.53 (0.35, 0.80) | 0.003 | 0.53 (0.35, 0.80) | 0.003 | 0.52 (0.35, 0.79) | 0.002 |
| Stroke | EVA | 2.53 (1.16, 5.52) | 0.020 | 2.53 (1.16, 5.52) | 0.020 | 2.17 (0.99, 4.78) | 0.054 |
| Normal VA | 1.00 (Reference) |  | 1.00 (Reference) |  | 1.00 (Reference) |  |
| SUPERNOVA | 0.72 (0.47, 1.12) | 0.146 | 0.72 (0.47, 1.12) | 0.146 | 0.81 (0.52, 1.28) | 0.372 |
| CVD Mortality | EVA | 3.84 (1.02, 14.50) | 0.047 | 3.84 (1.02, 14.50) | 0.047 | 3.96 (1.04, 15.07) | 0.044 |
| Normal VA | 1.00 (Reference) |  | 1.00 (Reference) |  | 1.00 (Reference) |  |
| SUPERNOVA | 1.01 (0.47, 2.17) | 0.979 | 1.01 (0.47, 2.17) | 0.979 | 0.98 (0.46, 2.12) | 0.965 |

Model 1: adjusted for age and sex; Model 2: adjusted for age, sex, and Framingham Risk Score; Model 3: Model 2 plus smoking status, drinking status, MET per week, and Townsend Deprivation Index.

VA: vascular aging, HR: hazard ratio, CI: confidence interval, MACE: major adverse cardiovascular events, MI: Myocardial infarction, CVD: Cardiovascular disease, EVA: early vascular aging, SUPERNOVA: Supernormal vascular aging.
